# Supplementary material for: Boosting the performance of perovskite solar cells through a novel active passivation method
Source: Royal Society of Chemistry journal article supplement (doi:10.1039/c8ta05593a), 2018-01-01
Supplement: c8ta05593a1.pdf [file c8ta05593a1.pdf]

**Support information**

**Boosting performance of perovskite solar cells through a novel  
active passivation method**

Pengfei wang<sup>a</sup>, Jiao Wang<sup>a</sup>, Xin zhang<sup>a</sup>, Haoliang Wang<sup>a</sup>, Xiaolei Cui<sup>a</sup>, Sijian Yuan<sup>a</sup>, Haizhou Lu<sup>a</sup>, Li Tu<sup>a</sup>,  
Yiqiang Zhan<sup>\*a</sup>, Lirong Zheng<sup>\*ab</sup>

<sup>a</sup> State Key Laboratory of ASIC and System, Center of Micro-Nano System, SIST, Fudan University, Shanghai 200433, China. E-mail: yqzhan@fudan.edu.cn, lrzheng@fudan.edu.cn

<sup>b</sup> Royal Inst Technol KTH, iPack VINN Excellence Ctr, S-16440 Stockholm, Sweden

This file includes Table S1 and Figure S1-S5.

Table S1 Full width at half maximum (FWHM) of (110) and (220) peak.

|            | <b>2θ(110)</b> | <b>FWHM</b> | <b>2θ(220)</b> | <b>FWHM</b> |
|------------|----------------|-------------|----------------|-------------|
| Ref 14 min | 14.175         | 0.086       | 28.463         | 0.095       |
| KCl 7 min  | 14.158         | 0.078       | 28.457         | 0.100       |
| KCl 14 min | 14.167         | 0.079       | 28.462         | 0.090       |
| KCl 20 min | 14.219         | 0.152       | 28.520         | 0.183       |

As displayed in Table S1, the FWHM of (110) and (220) peak of KCl-based perovskite film with 14 min thermal annealing is smaller than that of pristine MAPbI<sub>3-x</sub>Cl<sub>x</sub> film. It is consistent with the phenomenon that the crystallite size increased in the case of KCl pretreatment observed in SEM images.

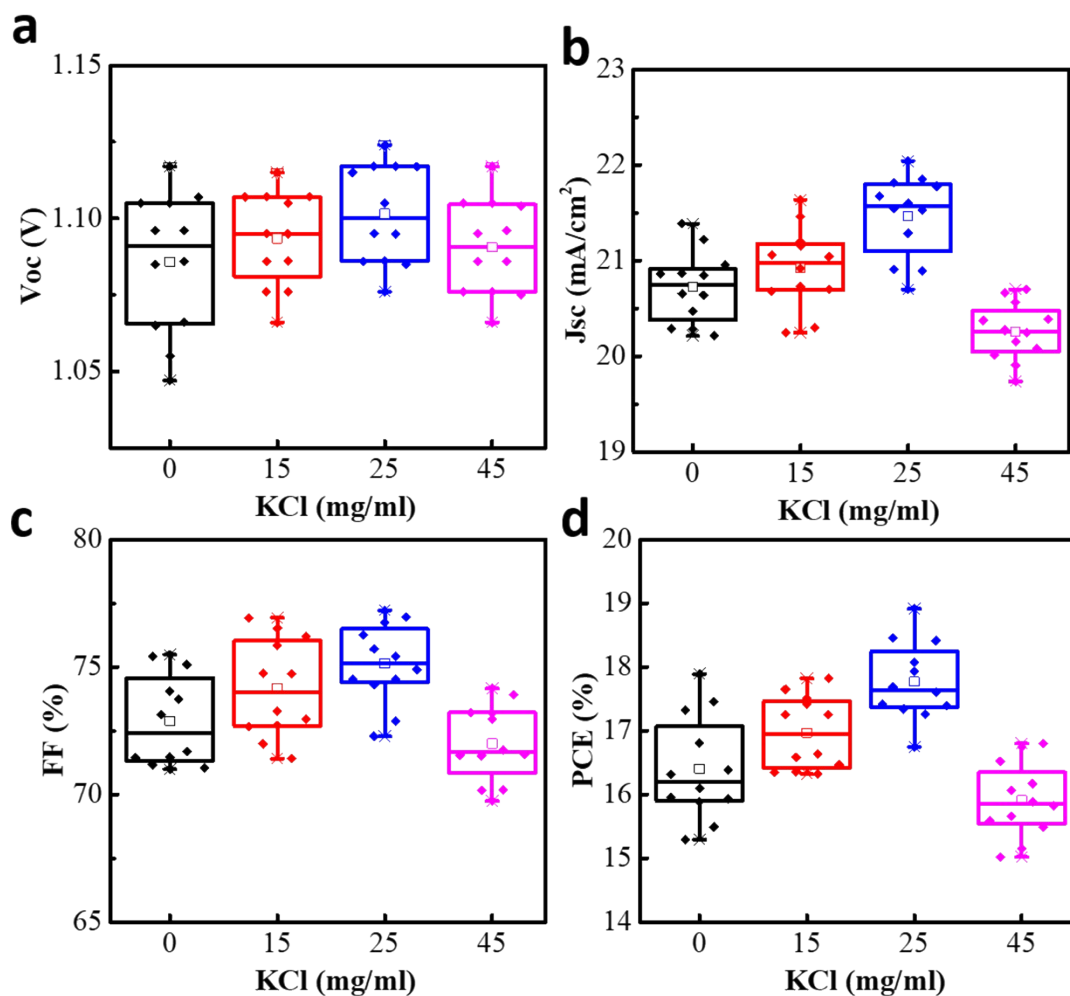

Figure S1 Photovoltaic performances statistics of PSCs teated with KCl solution of different concentrations.

Firstly, the KCl solution concentration is believed to have large impact on the device performance. As shown in Fig. S1, the proper concentration of KCl is 25 mg/ml. For the PSCs with a 15 mg/ml KCl solution treatment, both of  $J_{sc}$  and  $V_{oc}$  is enhanced compared to the pristine  $MAPbI_{3-x}Cl_x$ -based PSCs, results in an obvious increase of PCE. However, when the concentration of KCl solution reached 45 mg/ml, the inserted KCl layer was too thick to be absorbed completely by perovskite film during thermal annealing.

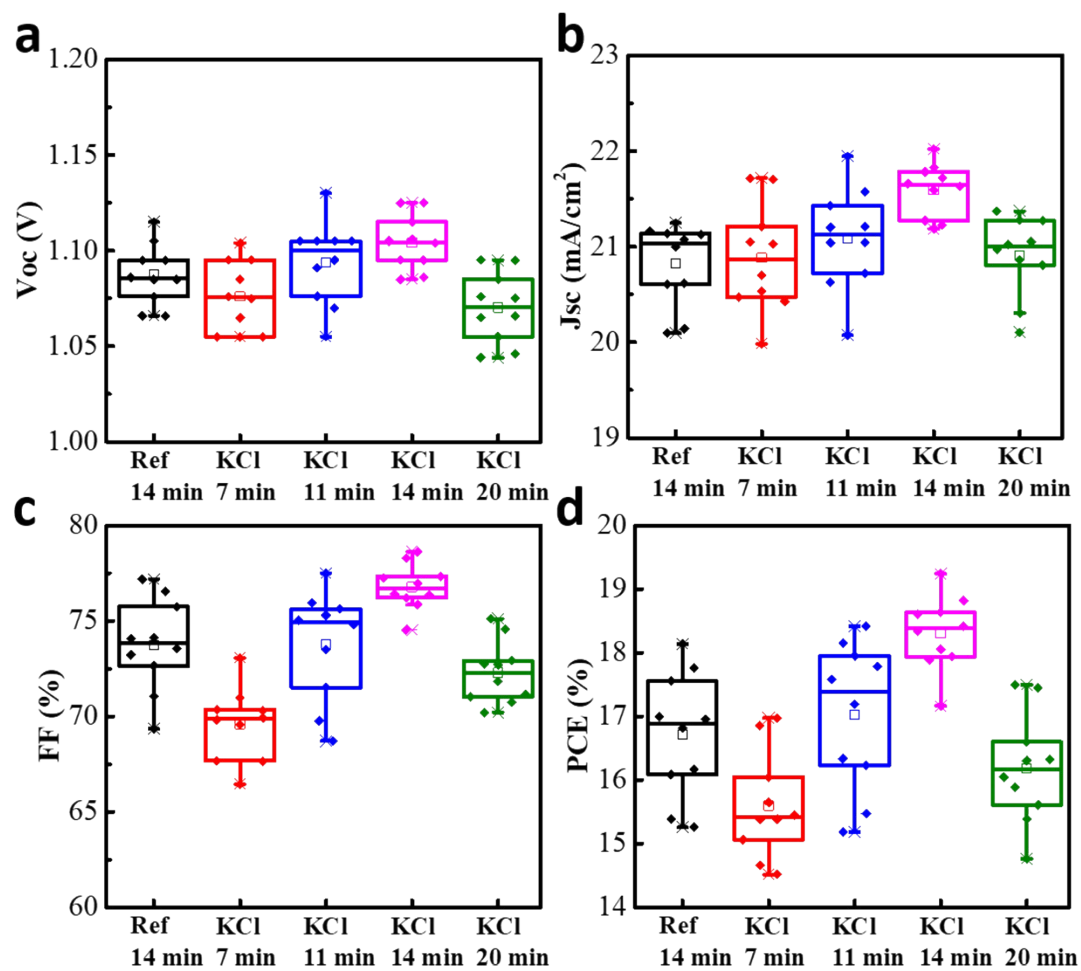

Figure S2 Photovoltaic performances statistics of KCl-based PSCs with different annealing time.

Meanwhile, the annealing time of perovskite film is regarded as another critical parameter of the fabrication. As shown in Fig. S2, the most suitable annealing time for KCl-based PSCs is 14 min.

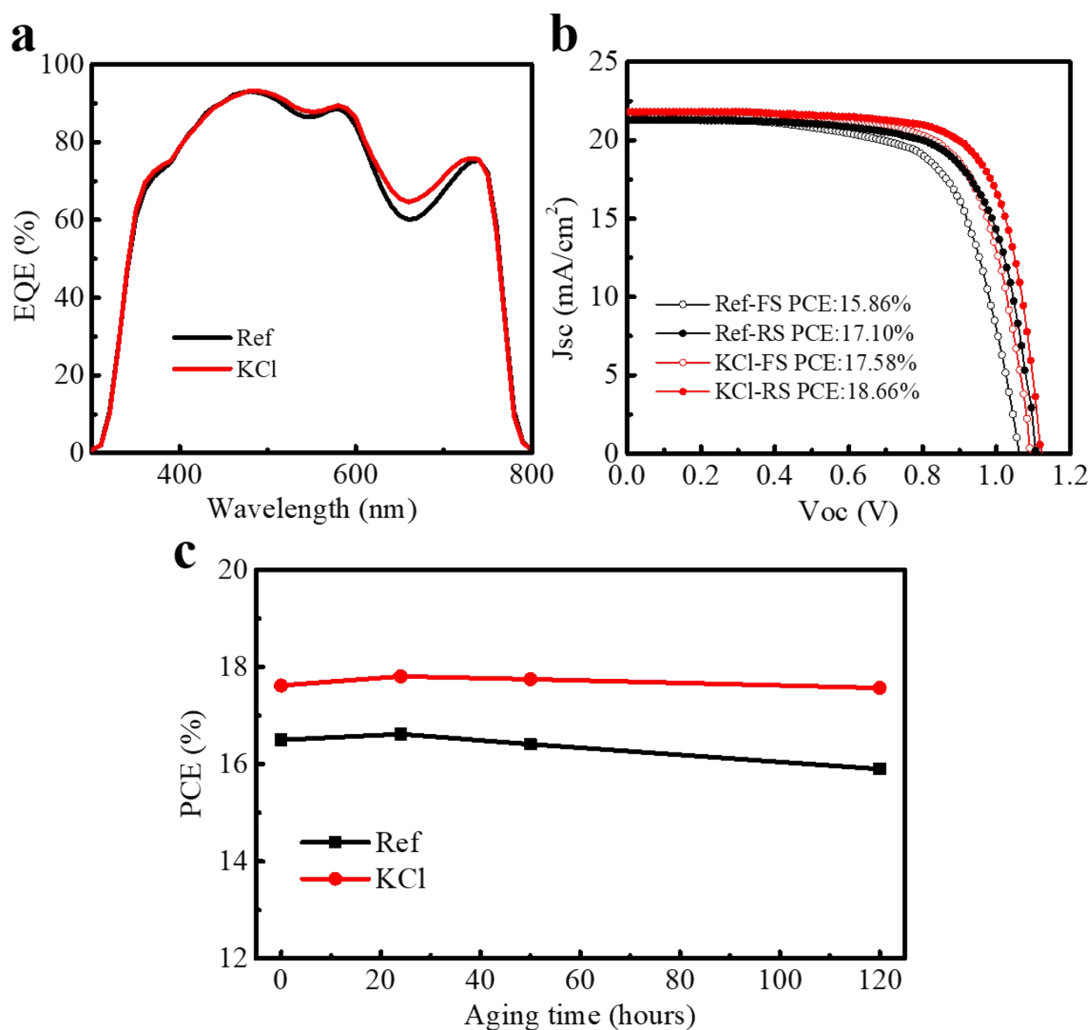

Figure S3 (a) EQE spectra of PSC with and without KCl pretreatment. (b) The J-V curve of pristine  $\text{MAPbI}_{3-x}\text{Cl}_x$  PSC (15.86% for forward scan (FS), 17.10% for reverse scan (RS)) and KCl-based PSC (17.58% for forward scan, 18.66% for reverse scan). (c) Long-term stabilities of PSCs with and without KCl pretreatment stored in glovebox without encapsulation.

As presented in Fig. S3a, the EQE spectra well matches with the enhancement of current density in the case of KCl pretreatment. The J-V curves of PSCs with and without KCl pretreatment were recorded in Fig. S3b. It should be noted that I-V hysteresis of PSCs was decreased by KCl pretreatment, where it could be ascribed to the reduction of trap states density. Comparison of the stability of KCl treated devices and pristine  $\text{MAPbI}_{3-x}\text{Cl}_x$ -based devices is given in Fig. S3c. The KCl treated PSCs are more stable than pristine  $\text{MAPbI}_{3-x}\text{Cl}_x$ -based PSCs.

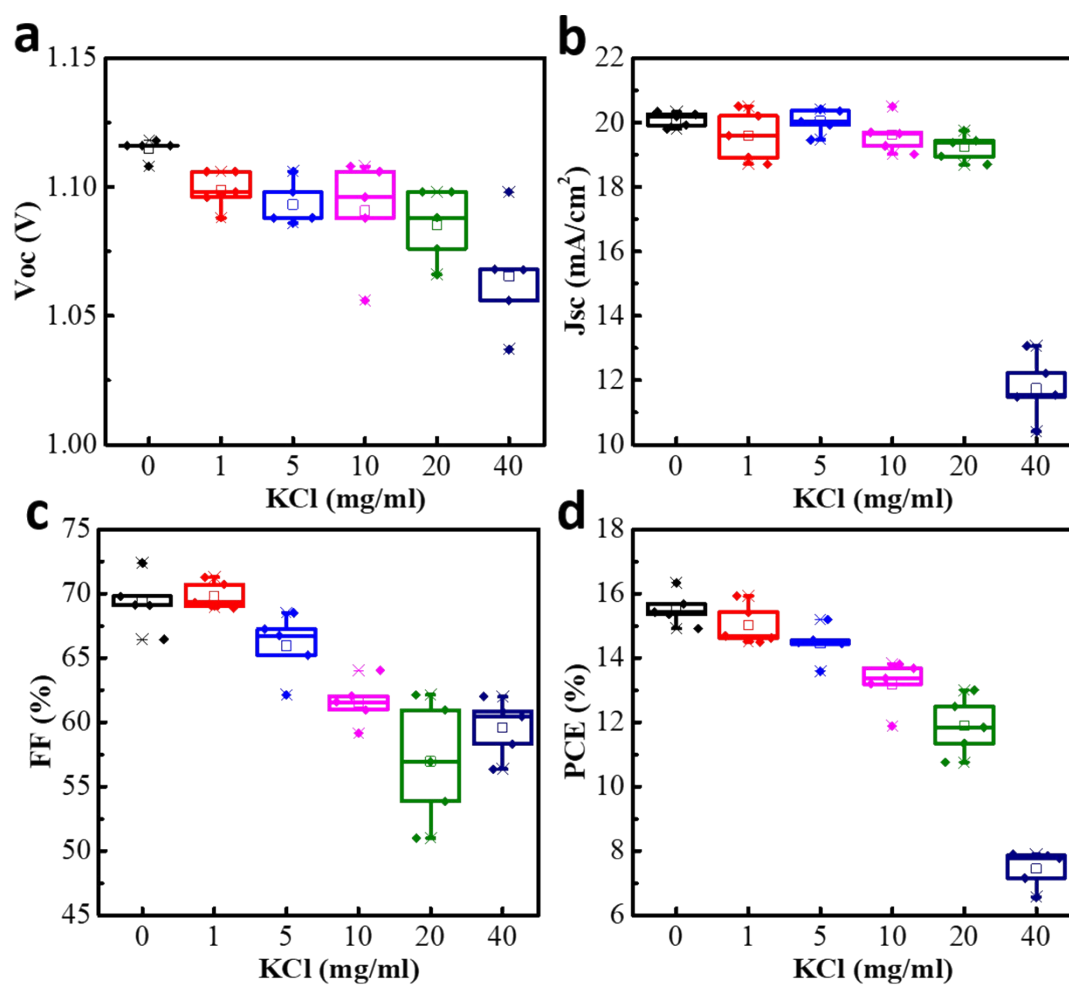

Figure S4 Photovoltaic performances statistics of PSCs with  $\text{SnO}_2$  layer prepared with mixed  $\text{SnO}_2$ :KCl (4:x mg/ml, x = 0, 1, 5, 10, 20 and 40) solution.

Apart from being absorbed by perovskite absorber, KCl may also diffuse into the electron transport layer ( $\text{SnO}_2$  layer). For the result displayed in Fig. S4, the performance of PSCs with KCl doped  $\text{SnO}_2$  did not enhance, confirming that the performance enhancement of KCl based PSCs is due to the diffusion of KCl into perovskite rather than  $\text{SnO}_2$ .

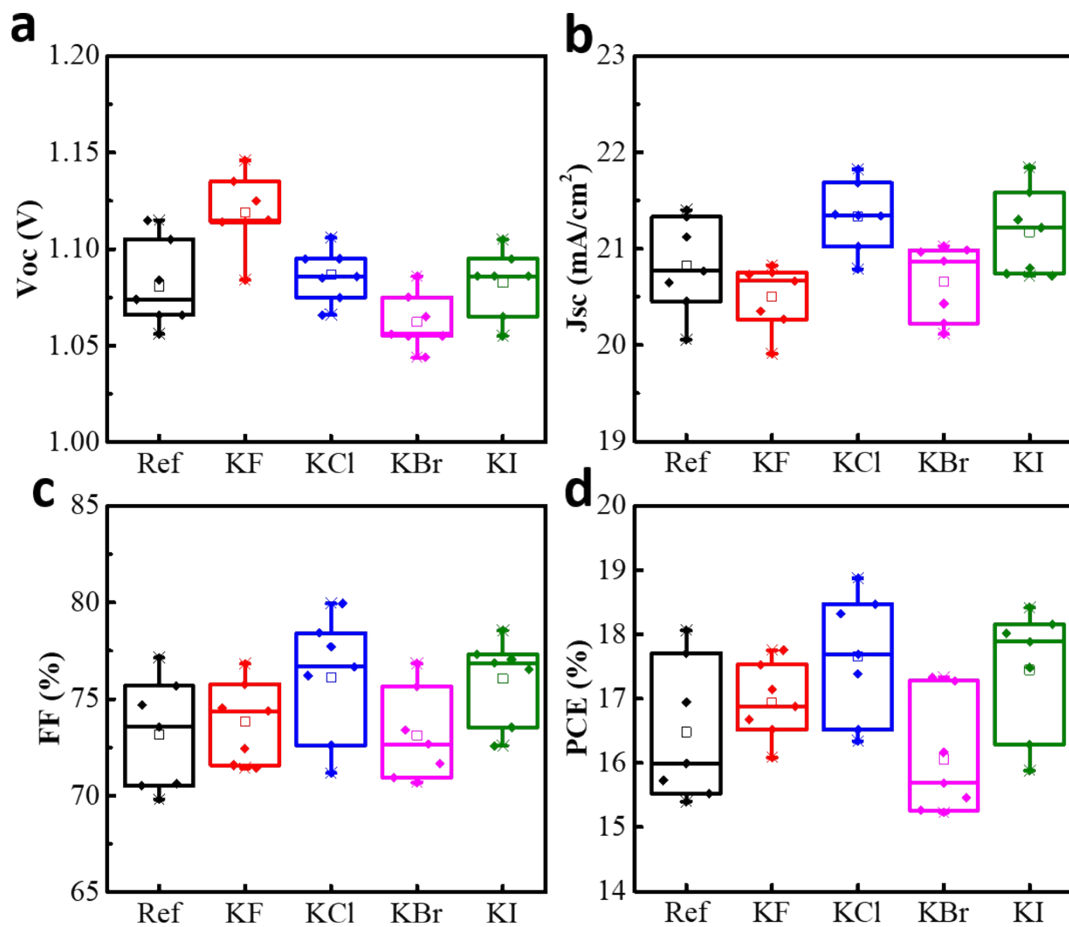

Figure S5 Photovoltaic performances statistics of PSCs treated with different potassium halides.

We replaced KCl with other potassium halides (KF, KBr, KI) to explore the effect of other potassium halides. The detailed statistic data of photovoltaic characteristics were plotted in Fig. S5. It is noteworthy that both KF and KI pretreatment could also improve device performance suggesting the similar diffusion process takes place at these two device as well. While KBr pretreatment did not show much improvement in device performance.
